# Supplementary material for: Structure and function of the silicifying peptide R5
Source: Royal Society of Chemistry journal article supplement (doi:10.1039/c4tb01679c), 2015-01-01
Supplement: c4tb01679c1.pdf [file c4tb01679c1.pdf]

## SUPPLEMENTARY DATA

### Structure and function of the silicifying peptide R5

<sup>1</sup>Senior, L., <sup>1</sup>Crump, M. P., <sup>1</sup>Williams, C., <sup>2</sup>Booth, P. J., <sup>1</sup>Mann, S., <sup>1</sup>Perriman, A. W. and <sup>1</sup>Curnow, P.

<sup>1</sup>University of Bristol and <sup>2</sup>King's College London, UK.

The purity and identity of the commercially-synthesised R5 peptide (SSKKSGSYSGSGSKRRIL) were confirmed by LC-MS analysis carried out by the vendor (Generon). The results are shown in Supplementary Figure 1. The peptide was found to be ≥95% pure and had the expected molecular weight of 2012.4, identical to the molecular weight calculated from the primary sequence.

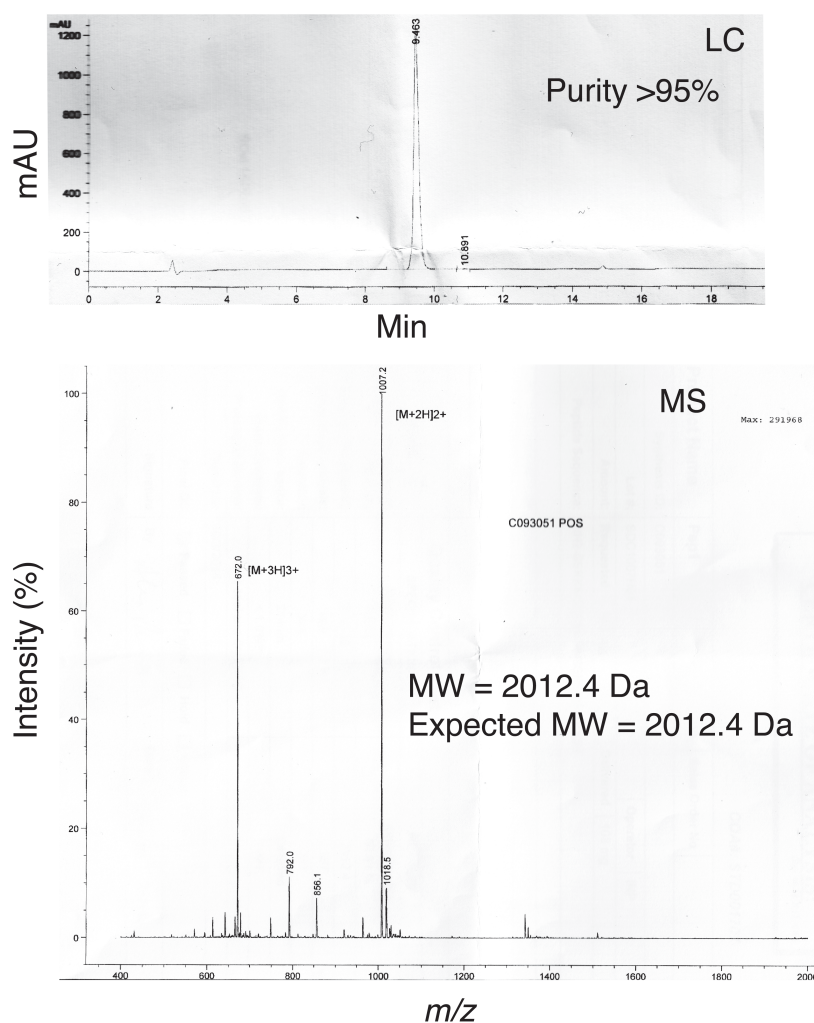

**Supplementary Figure 1.** LC-MS analysis of synthesized R5 peptide, carried out by the commercial vendor.
